# Supplementary material for: Peptidylarginine Deiminase Inhibition Abolishes the Production of Large Extracellular Vesicles From Giardia intestinalis, Affecting Host-Pathogen Interactions by Hindering Adhesion to Host Cells
Source: Front Cell Infect Microbiol. 2020 Sep 23;10:417. doi: 10.3389/fcimb.2020.00417 (PMC7539837; doi:10.3389/fcimb.2020.00417)
Supplement: Supplementary Table 2 — Products associated with cytoskeleton (microtubules), ventral disk, median body and flagella, and oxidative stress responses found in LEVs. [file Table_2.xlsx]

## Sheet: cytoskeleton-associated 
Product	Protein description
GL50803_17090	SAM domain
GL50803_86676	Delta-giardin
GL50803_17230	Gamma-giardin
GL50803_14551	Alpha-6-giardin
GL50803_11654	Alpha-1-giardin
GL50803_7796	Alpha-2-giardin
GL50803_15410	Ser/Thr protein kinase
GL50803_11390	NEK kinase
GL50803_15409	NEK kinase
GL50803_8389	Katanin p60
GL50803_102101	Kinesin-3
GL50803_12139	Ankyrin repeat (Protein 21.1)
GL50803_14859	Ankyrin repeat (Protein 21.1)
GL50803_17551	Ankyrin repeat (Protein 21.1)
GL50803_7021	Ankyrin repeat (Protein 21.1)
GL50803_16263	DIP13
GL50803_7520	Hypothetical protein
GL50803_16343	Median body protein
GL50803_13584	Hypothetical protein

## Sheet: oxidative-stress response
Product	Protein description
GL50803_5810	PNPOx domain-containing protein
GL50803_13864	HSP 90-alpha
GL50803_9355	Hypothetical protein (thioredoxin like)
GL50803_15383	Peroxiredoxin-1
GL50803_27310	Stress-induced-phosphoprotein1
GL50803_6289	FixW protein, putative
GL50803_86676	Delta giardin
GL50803_88765	Cytosolic HSP 70
GL50803_114609	Pyruvate ferredoxin oxidoreductase
GL50803_8064	Protein disulfide isomerase
